# Supplementary material for: Permutation symmetry in spin-adapted many-body wave functions
Source: Royal Society of Chemistry journal article supplement (doi:10.1039/d4fd00061g), 2024-01-01
Supplement: d4fd00061g1.pdf [file d4fd00061g1.pdf]

Cite this: DOI: 00.0000/xxxxxxxxxx

## Permutation Symmetry in Spin Adapted Many-Body Wave Functions

Maru Song,<sup>a</sup> Ali Alavi,<sup>a,b</sup> and Giovanni Li Manni<sup>\*a</sup>

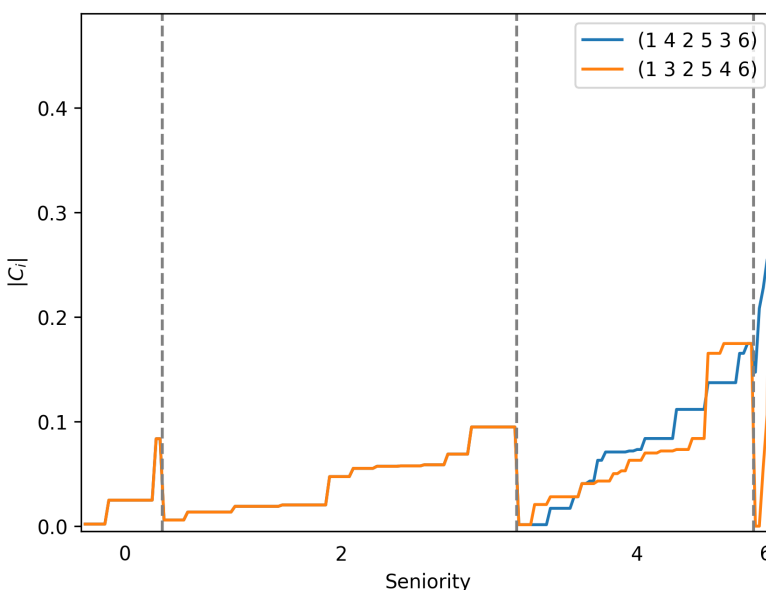

Fig. 1 Absolute values of the GUGA CI vectors of a (6e, 6o) benzene cluster using (142536) and (132546) orderings. The cluster consists of localized  $2p_z$  orbitals. CSFs are classified by their seniority and different seniority blocks are distinguished by vertical dashed lines. Within the seniority-4 block, the  $L_4$  norms of (142536) and (132546) orderings are 0.3003 and 0.3243, respectively. The  $L_4$  norms of (142536) and (132546) within the seniority-6 block are 0.3408 and 0.4823, respectively.

Table 1 Symmetry Non-Equivalent Site Orderings and Corresponding  $L_4$ -Norms<sup>a</sup> for two 4-Site Rhombus Clusters with  $S_{loc} = 1/2$

| Sym. Elem.         | Symmetry Non-Equivalent Site Orderings |       |       |       |              |              |
|--------------------|----------------------------------------|-------|-------|-------|--------------|--------------|
|                    | 1234                                   | 2314  | 2341  | 1243  | 1324         | 2413         |
| $E$                | 1234                                   | 2314  | 2341  | 1243  | 1324         | 2413         |
| $C_2(z)$           | 3412                                   | 4132  | 4123  | 3421  | 3142         | 4231         |
| $C_2(y)$           | 1432                                   | 4312  | 4321  | 1423  | 1342         | 4213         |
| $C_2(x)$           | 3214                                   | 2134  | 2143  | 3241  | 3124         | 2431         |
| $L_4(S_{tot} = 0)$ | 0.889                                  | 0.889 | 0.889 | 0.889 | <b>1.000</b> | <b>1.000</b> |
| $L_4(S_{tot} = 1)$ | 0.847                                  | 0.847 | 0.889 | 0.889 | 0.863        | <b>1.000</b> |

<sup>a</sup>  $L_4$ -norm calculated from the CI eigenvectors for each site ordering.

<sup>b</sup> We use  $J_{12} = J_{23} = J_{34} = J_{14} = -1.789$ ,  $J_{13} = -1.000$ , and  $J_{24} = -2.000$ .

<sup>a</sup> Electronic Structure Theory Department, Max Planck Institute for Solid State Research, Heisenbergstraße 1, 70569 Stuttgart, Germany

<sup>b</sup> Yusuf Hamied Department of Chemistry, University of Cambridge, Lensfield Road, Cambridge CB2 1EW, United Kingdom

\* Corresponding Author: giovannilimanni@gmail.com, g.limanni@fkf.mpg.de

Table 2 Symmetry Non-Equivalent Site Orderings and Corresponding  $L_4$ -Norms<sup>a</sup> for a 4-Site Kite Cluster with  $S_{\text{loc}} = 1/2$

| Sym. Elem.                | Symmetry Non-Equivalent Site Orderings |       |       |       |       |       |       |       |              |              |              |              |
|---------------------------|----------------------------------------|-------|-------|-------|-------|-------|-------|-------|--------------|--------------|--------------|--------------|
| $E$                       | 2314                                   | 3412  | 4132  | 1234  | 4123  | 1243  | 2341  | 3421  | 1324         | 3142         | 4231         | 2413         |
| $C_2(z)$                  | 4312                                   | 3214  | 2134  | 1432  | 2143  | 1423  | 4321  | 3241  | 1342         | 3124         | 2431         | 4213         |
| $L_4(S_{\text{tot}} = 0)$ | 0.889                                  | 0.889 | 0.889 | 0.889 | 0.889 | 0.889 | 0.889 | 0.889 | <b>1.000</b> | <b>1.000</b> | <b>1.000</b> | <b>1.000</b> |
| $L_4(S_{\text{tot}} = 1)$ | 0.835                                  | 0.835 | 0.886 | 0.886 | 0.888 | 0.888 | 0.925 | 0.925 | 0.779        | 0.779        | 0.928        | <b>0.998</b> |

<sup>a</sup>  $L_4$ -norm calculated from the CI eigenvectors for each site ordering.

<sup>b</sup> We use  $J_{12} = J_{14} = -1.638$ ,  $J_{23} = J_{34} = -0.894$ ,  $J_{13} = -0.741$ , and  $J_{24} = -1.000$ .

Table 3 Symmetry Non-Equivalent Site Orderings and Corresponding  $L_4$ -Norms<sup>a</sup> for a 4-Site Irregular Tetrahedron Cluster with  $S_{\text{loc}} = 1/2$

| Sym. Elem.                | Symmetry Non-Equivalent Site Orderings |       |       |       |       |       |       |       |              |              |              |              |
|---------------------------|----------------------------------------|-------|-------|-------|-------|-------|-------|-------|--------------|--------------|--------------|--------------|
| $E$                       | 1342                                   | 1432  | 3142  | 4132  | 1324  | 1423  | 3124  | 4123  | 3412         | 4312         | 1234         | 1243         |
| $\sigma$                  | 2341                                   | 2431  | 3241  | 4231  | 2314  | 2413  | 3214  | 4213  | 3421         | 4321         | 2134         | 2143         |
| $L_4(S_{\text{tot}} = 0)$ | 0.889                                  | 0.889 | 0.889 | 0.889 | 0.889 | 0.889 | 0.889 | 0.889 | <b>1.000</b> | <b>1.000</b> | <b>1.000</b> | <b>1.000</b> |
| $L_4(S_{\text{tot}} = 1)$ | 0.847                                  | 0.847 | 0.847 | 0.847 | 0.889 | 0.889 | 0.889 | 0.889 | 0.863        | 0.863        | <b>1.000</b> | <b>1.000</b> |

<sup>a</sup>  $L_4$ -norm calculated from the CI eigenvectors for each site ordering.

<sup>b</sup> We use  $J_{12} = -6.770$ ,  $J_{13} = J_{23} = -4.320$ , and  $J_{14} = J_{24} = J_{34} = -3.140$ .

Table 4 Symmetry Non-Equivalent Site Orderings and Corresponding  $L_4$ -Norms<sup>a</sup> for a 4-Site Irregular Tetrahedron Cluster with  $S_{\text{loc}} = 3/2$

| Sym. Elem.                | Symmetry Non-Equivalent Site Orderings |       |       |       |       |       |       |       |             |              |              |              |
|---------------------------|----------------------------------------|-------|-------|-------|-------|-------|-------|-------|-------------|--------------|--------------|--------------|
| $E$                       | 1342                                   | 1432  | 3142  | 4132  | 1324  | 1423  | 3124  | 4123  | 3412        | 4312         | 1234         | 1243         |
| $\sigma$                  | 2341                                   | 2431  | 3241  | 4231  | 2314  | 2413  | 3214  | 4213  | 3421        | 4321         | 2134         | 2143         |
| $L_4(S_{\text{tot}} = 0)$ | 0.681                                  | 0.681 | 0.681 | 0.681 | 0.681 | 0.681 | 0.681 | 0.681 | <b>1.00</b> | <b>1.000</b> | <b>1.000</b> | <b>1.000</b> |
| $L_4(S_{\text{tot}} = 1)$ | 0.470                                  | 0.470 | 0.470 | 0.470 | 0.546 | 0.546 | 0.546 | 0.546 | 0.581       | 0.581        | <b>0.802</b> | <b>0.802</b> |
| $L_4(S_{\text{tot}} = 3)$ | 0.613                                  | 0.613 | 0.613 | 0.613 | 0.681 | 0.681 | 0.681 | 0.681 | 0.636       | 0.636        | <b>1.000</b> | <b>1.000</b> |

<sup>a</sup>  $L_4$ -norm calculated from the CI eigenvectors for each site ordering.

<sup>b</sup> We use  $J_{12} = -6.770$ ,  $J_{13} = J_{23} = -4.320$ , and  $J_{14} = J_{24} = J_{34} = -3.140$ .

Table 5 Symmetry Non-Equivalent Site Orderings and Corresponding  $L_4$ -Norms<sup>a</sup> for a 6-Site Hexagon Cluster with  $S_{loc} = 3/2$

| Sym. Elem.         | Symmetry Non-Equivalent Site Orderings |          |                 |                 |          |          |          |          |                 |                 |
|--------------------|----------------------------------------|----------|-----------------|-----------------|----------|----------|----------|----------|-----------------|-----------------|
| $E$                | 142536                                 | 143625   | 142563          | 143652          | 142365   | 143256   | 142356   | 143265   | 124536          | 125463          |
| $L_4(S_{tot} = 0)$ | 0.291605                               | 0.291605 | 0.291605        | 0.291605        | 0.416236 | 0.416236 | 0.416236 | 0.416236 | 0.416236        | 0.416236        |
| $L_4(S_{tot} = 1)$ | 0.219767                               | 0.219767 | 0.219773        | 0.219773        | 0.276694 | 0.276694 | 0.278434 | 0.278434 | 0.318175        | 0.318175        |
| $L_4(S_{tot} = 2)$ | 0.192944                               | 0.192944 | 0.192956        | 0.192956        | 0.208708 | 0.208708 | 0.213273 | 0.213273 | 0.280617        | 0.280617        |
| $L_4(S_{tot} = 3)$ | 0.189795                               | 0.189795 | 0.189813        | 0.189813        | 0.187739 | 0.187739 | 0.194028 | 0.194028 | 0.272746        | 0.272746        |
| $L_4(S_{tot} = 4)$ | 0.191527                               | 0.191527 | 0.191607        | 0.191607        | 0.190432 | 0.190432 | 0.195471 | 0.195471 | 0.236338        | 0.236338        |
| $E$                | 124563                                 | 125436   | 123645          | 126354          | 123654   | 126345   | 123465   | 126534   | 123456          | 126543          |
| $L_4(S_{tot} = 0)$ | 0.416236                               | 0.416236 | 0.431538        | 0.431538        | 0.431538 | 0.431538 | 0.468135 | 0.468135 | 0.468135        | 0.468135        |
| $L_4(S_{tot} = 1)$ | 0.318179                               | 0.318179 | 0.292137        | 0.292137        | 0.293135 | 0.293135 | 0.331733 | 0.331733 | 0.324428        | 0.324428        |
| $L_4(S_{tot} = 2)$ | 0.280635                               | 0.280635 | 0.224665        | 0.224665        | 0.227524 | 0.227524 | 0.265640 | 0.265640 | 0.245845        | 0.245845        |
| $L_4(S_{tot} = 3)$ | 0.272756                               | 0.272756 | 0.201068        | 0.201068        | 0.205700 | 0.205700 | 0.232805 | 0.232805 | 0.213734        | 0.213734        |
| $L_4(S_{tot} = 4)$ | 0.236554                               | 0.236554 | 0.197559        | 0.197559        | 0.202504 | 0.202504 | 0.217486 | 0.217486 | 0.207280        | 0.207280        |
| $E$                | 142635                                 | 143526   | 134652          | 136452          | 134625   | 136425   | 142653   | 143562   | 124356          | 125643          |
| $L_4(S_{tot} = 0)$ | 0.471383                               | 0.471383 | 0.471383        | 0.471383        | 0.471383 | 0.471383 | 0.471383 | 0.471383 | 0.480340        | 0.480340        |
| $L_4(S_{tot} = 1)$ | 0.332913                               | 0.332913 | 0.355124        | 0.355124        | 0.355128 | 0.355128 | 0.337523 | 0.337523 | 0.331241        | 0.331241        |
| $L_4(S_{tot} = 2)$ | 0.257797                               | 0.257797 | 0.307266        | 0.307266        | 0.307280 | 0.307280 | 0.264773 | 0.264773 | 0.251096        | 0.251096        |
| $L_4(S_{tot} = 3)$ | 0.224646                               | 0.224646 | 0.293867        | 0.293867        | 0.293879 | 0.293879 | 0.231316 | 0.231316 | 0.216035        | 0.216035        |
| $L_4(S_{tot} = 4)$ | 0.219303                               | 0.219303 | 0.278047        | 0.278047        | 0.278153 | 0.278153 | 0.224180 | 0.224180 | 0.206298        | 0.206298        |
| $E$                | 124365                                 | 125634   | 134265          | 136245          | 124635   | 125364   | 124653   | 125346   | 134256          | 136254          |
| $L_4(S_{tot} = 0)$ | 0.480340                               | 0.480340 | 0.632198        | 0.632198        | 0.632198 | 0.632198 | 0.632198 | 0.632198 | 0.632198        | 0.632198        |
| $L_4(S_{tot} = 1)$ | 0.339496                               | 0.339496 | 0.423450        | 0.423450        | 0.427328 | 0.427328 | 0.459971 | 0.459971 | 0.430079        | 0.430079        |
| $L_4(S_{tot} = 2)$ | 0.270617                               | 0.270617 | 0.311060        | 0.311060        | 0.312347 | 0.312347 | 0.365193 | 0.365193 | 0.325974        | 0.325974        |
| $L_4(S_{tot} = 3)$ | 0.235881                               | 0.235881 | 0.268057        | 0.268057        | 0.257556 | 0.257556 | 0.309530 | 0.309530 | 0.281832        | 0.281832        |
| $L_4(S_{tot} = 4)$ | 0.217332                               | 0.217332 | 0.258340        | 0.258340        | 0.238293 | 0.238293 | 0.269477 | 0.269477 | 0.267279        | 0.267279        |
| $E$                | 132456                                 | 132654   | 123564          | 126435          | 132465   | 132645   | 123546   | 126453   | 134526          | 136524          |
| $L_4(S_{tot} = 0)$ | 0.648718                               | 0.648718 | 0.648718        | 0.648718        | 0.648718 | 0.648718 | 0.648718 | 0.648718 | 0.762381        | 0.762381        |
| $L_4(S_{tot} = 1)$ | 0.437035                               | 0.437035 | 0.439802        | 0.439802        | 0.443763 | 0.443763 | 0.468612 | 0.468612 | 0.527784        | 0.527784        |
| $L_4(S_{tot} = 2)$ | 0.319355                               | 0.319355 | 0.321913        | 0.321913        | 0.338498 | 0.338498 | 0.369095 | 0.369095 | 0.392766        | 0.392766        |
| $L_4(S_{tot} = 3)$ | 0.268387                               | 0.268387 | 0.264519        | 0.264519        | 0.291311 | 0.291311 | 0.311348 | 0.311348 | 0.324011        | 0.324011        |
| $L_4(S_{tot} = 4)$ | 0.253824                               | 0.253824 | 0.242747        | 0.242747        | 0.269766 | 0.269766 | 0.270352 | 0.270352 | 0.296710        | 0.296710        |
| $E$                | 134562                                 | 136542   | 135426          | 135624          | 135462   | 135642   | 135246   | 135264   | 132546          | 132564          |
| $L_4(S_{tot} = 0)$ | 0.762381                               | 0.762381 | 0.903035        | 0.903035        | 0.903035 | 0.903035 | 0.903265 | 0.903265 | <b>0.942394</b> | <b>0.942394</b> |
| $L_4(S_{tot} = 1)$ | 0.547272                               | 0.547272 | 0.631282        | 0.631282        | 0.631344 | 0.631344 | 0.631353 | 0.631353 | <b>0.650726</b> | <b>0.650726</b> |
| $L_4(S_{tot} = 2)$ | 0.424058                               | 0.424058 | 0.470572        | 0.470572        | 0.470672 | 0.470672 | 0.470556 | 0.470556 | <b>0.473444</b> | <b>0.473444</b> |
| $L_4(S_{tot} = 3)$ | 0.354116                               | 0.354116 | <b>0.381139</b> | <b>0.381139</b> | 0.381073 | 0.381073 | 0.381019 | 0.381019 | 0.370511        | 0.370511        |
| $L_4(S_{tot} = 4)$ | 0.319076                               | 0.319076 | <b>0.338540</b> | <b>0.338540</b> | 0.338478 | 0.338478 | 0.338517 | 0.338517 | 0.318171        | 0.318171        |

<sup>a</sup>  $L_4$ -norm calculated from the CI eigenvectors for each site ordering.

<sup>b</sup> We use  $J_{12} = J_{23} = J_{34} = J_{45} = J_{56} = J_{16} = -6.700$ ,  $J_{13} = J_{24} = J_{35} = J_{46} = J_{15} = J_{26} = -3.500$ , and  $J_{14} = J_{25} = J_{36} = -3.100$ .
